# Supplementary material for: A new approach for increasing graduate students’ science communication capacity and confidence
Source: PeerJ. 2024 Dec 20;12:e18594. doi: 10.7717/peerj.18594 (PMC11665425; doi:10.7717/peerj.18594)
Supplement: Supplemental Information 1 [file peerj-12-18594-s001.xlsx]

## Sheet: LO1
Start_Date_1	ID	Cohort	Student_Y_N	year_createmutiple_drafts_1_lo1	routine_consistent_1_lo1	Start_Date_2	ID	year_createmutiple_drafts_5_lo1	routine_consistent_5_lo1	Start_Date_3	ID	year_createmutiple_drafts_6_lo1	routine_consistent_6_lo1	Start_Date_4	ID	year_createmutiple_drafts_9_lo1	routine_consistent_9_lo1
2017-09-05 13:19:00	1	2	1	1	4		1			2018-11-19 12:26:00	1	5	4	2019-07-24 08:12:00	1
2017-09-05 13:18:00	2	2	1	4	3		2				2				2
2017-09-26 09:15:00	3	2	1	4	4	2018-05-02 14:34:00	3	5	5	2018-09-13 14:05:00	3	4	5	2019-02-10 17:15:00	3	4	5
2017-09-05 13:22:00	4	2	1	4	1	2018-05-24 15:50:00	4	5	4	2018-10-02 08:26:00	4	5	2	2019-02-08 11:49:00	4	5	3
2017-09-05 13:11:00	5	2	1	4	3	2018-05-22 16:14:00	5	5	4	2018-09-25 14:05:00	5	4	3	2019-07-30 20:19:00	5	5	5
2017-09-05 13:19:00	6	2	1	5	2	2018-05-10 19:44:00	6	3	3	2018-11-19 11:53:00	6	5	1	2019-02-14 09:54:00	6	5	1
2016-09-06	7	1	1	4	3	2017-05-03	7	5	5	2017-09-05 12:55:00	7	5	4		7
2016-09-06	8	1	1	4	4	2017-05-03	8	5	4	2017-09-05 13:09:00	8	5	3		8
2016-09-06	9	1	1	4	4	2017-05-03	9	5	4	2017-09-05 13:14:00	9	4	2		9
2016-09-06	10	1	1	5	4		10			2017-09-05 14:01:00	10	4	3	2018-02-28 08:59:00	10	5	2
2016-09-06	11	1	1	5	4	2017-05-03	11	2	2	2017-09-05 13:16:00	11	5	2	2018-05-22 14:21:00	11	5	5
2016-09-06	12	1	1	3	4	2017-05-03	12	5	4	2017-09-05 13:11:00	12	4	2		12

## Sheet: LO3
Start_Date_1	ID	Cohort	Student_Y_N	year_peer_review_discussion_1_lo3	year_sharedWork_1_lo3	year_review_othersWriting_1_lo3	year_reviewto_revision_1_lo3	Start_Date_2	ID	year_sharedWork_5_lo3	Start_Date_3	ID	year_peer_review_discussion_6_lo3	year_sharedWork_6_lo3	year_review_othersWriting_6_lo3	year_reviewto_revision_6_lo3	Start_Date_4	ID	year_sharedWork_9_lo3
2017-09-05 13:19:00	1	2	1	1	1	1	1		1		2018-11-19 12:26:00	1	5	4	3	5	2019-07-24 08:12:00	1
2017-09-05 13:18:00	2	2	1	3	3	3	3		2			2						2
2017-09-26 09:15:00	3	2	1	3	4	3	3	2018-05-02 14:34:00	3	5	2018-09-13 14:05:00	3	4	4	4	4	2019-02-10 17:15:00	3	4
2017-09-05 13:22:00	4	2	1	4	4	4	3	2018-05-24 15:50:00	4	5	2018-10-02 08:26:00	4	5	5	4	4	2019-02-08 11:49:00	4	5
2017-09-05 13:11:00	5	2	1	4	3	3	3	2018-05-22 16:14:00	5	5	2018-09-25 14:05:00	5	3	3	3	4	2019-07-30 20:19:00	5	4
2017-09-05 13:19:00	6	2	1	4	4	2	1	2018-05-10 19:44:00	6	3	2018-11-19 11:53:00	6	4	3	3	4	2019-02-14 09:54:00	6	5
2016-09-06	7	1	1	3	4	2	3	2017-05-03	7	5	2017-09-05 12:55:00	7	5	5	5	5		7
2016-09-06	8	1	1	4	4	3	4	2017-05-03	8	5	2017-09-05 13:09:00	8	4	4	3	3		8
2016-09-06	9	1	1	4	4	4	4	2017-05-03	9	5	2017-09-05 13:14:00	9	5	4	3	4		9
2016-09-06	10	1	1	3	5	2	4		10		2017-09-05 14:01:00	10	4	4	4	4	2018-02-28 08:59:00	10	4
2016-09-06	11	1	1	5	5	3	4	2017-05-03	11	2	2017-09-05 13:16:00	11	4	5	3	4	2018-05-22 14:21:00	11	5
2016-09-06	12	1	1	1	2	4	3	2017-05-03	12	5	2017-09-05 13:11:00	12	3	5	4	4		12

## Sheet: Confidence
Start_Date_1	ID	Cohort	Student_Y_N	confidence_writer_1	confidence_scientist_1	Start_Date_2	ID	confidence_writer_2	confidence_scientist_2	Start_Date_3	ID	confidence_writer_3	confidence_scientist_3	Start_Date_4	ID	confidence_writer_4	confidence_scientist_4
2017-09-05 13:19:00	1	2	1	3	3		1			2018-11-19 12:26:00	1	3	4	2019-07-24 08:12:00	1	4	4
2017-09-05 13:18:00	2	2	1	3	3		2				2				2
2017-09-26 09:15:00	3	2	1	1	4	2018-05-02 14:34:00	3	3	4	2018-09-13 14:05:00	3	2	3	2019-02-10 17:15:00	3	3	4
2017-09-05 13:22:00	4	2	1	3	4	2018-05-24 15:50:00	4	4	5	2018-10-02 08:26:00	4	4	5	2019-02-08 11:49:00	4	4	5
2017-09-05 13:11:00	5	2	1	3	4	2018-05-22 16:14:00	5	4	4	2018-09-25 14:05:00	5	4	4	2019-07-30 20:19:00	5	4	3
2017-09-05 13:19:00	6	2	1	4	3	2018-05-10 19:44:00	6	4	2	2018-11-19 11:53:00	6	4	2	2019-02-14 09:54:00	6	4	3
2016-09-06	7	1	1	3	3	2017-05-03	7	4	4	2017-09-05 12:55:00	7	4	4		7
2016-09-06	8	1	1	4	3	2017-05-03	8	4	3	2017-09-05 13:09:00	8	4	3		8
2016-09-06	9	1	1	2	3	2017-05-03	9	3	4	2017-09-05 13:14:00	9	2	3		9
2016-09-06	10	1	1	2	4		10			2017-09-05 14:01:00	10	3	3	2018-02-28 08:59:00	10	3	3
2016-09-08	11	1	1	4	2	2017-05-03	11	4	3	2017-09-05 13:16:00	11	4	4	2018-05-22 14:21:00	11	4	1
2016-10-04	12	1	1	3	3	2017-05-03	12	4	3	2017-09-05 13:11:00	12	4	3		12

## Sheet: Daly Miller
Start_Date_1	ID	Cohort	Student_Y_N	DMtotal_1	Start_Date_2	ID	DMtotal_2	Start_Date_3	ID	DMtotal_3	Start_Date_4	ID	DMtotal_4
2017-09-05 13:19:00	1	2	1	54		1		2018-11-19 12:26:00	1	46	2019-07-24 08:12:00	1	46
2017-09-05 13:18:00	2	2	1	66		2			2			2
2017-09-26 09:15:00	3	2	1	69	2018-05-02 14:34:00	3	62	2018-09-13 14:05:00	3	64	2019-02-10 17:15:00	3	60
2017-09-05 13:22:00	4	2	1	61	2018-05-24 15:50:00	4	44	2018-10-02 08:26:00	4	46	2019-02-08 11:49:00	4	49
2017-09-05 13:11:00	5	2	1	54	2018-05-22 16:14:00	5	57	2018-09-25 14:05:00	5		2019-07-30 20:19:00	5	56
2017-09-05 13:19:00	6	2	1	55	2018-05-10 19:44:00	6	46	2018-11-19 11:53:00	6	59	2019-02-14 09:54:00	6	46
2016-09-06	7	1	1	64	2017-05-03	7	51	2017-09-05 12:55:00	7	56		7
2016-09-06	8	1	1	54	2017-05-03	8	53	2017-09-05 13:09:00	8	55		8
2016-09-06	9	1	1	86	2017-05-03	9	84	2017-09-05 13:14:00	9	79		9
2016-09-06	10	1	1	76		10		2017-09-05 14:01:00	10	71	2018-02-28 08:59:00	10	60
2016-10-04	11	1	1	32	2017-05-03	11	83	2017-09-05 13:16:00	11	63	2018-05-22 14:21:00	11	39
2016-10-04	12	1	1	47	2017-05-03	12	48	2017-09-05 13:11:00	12	52		12
